# Supplementary material for: Platinum(ii) 1,10-phenanthroline complexes of acetylides containing redox-active groups
Source: Royal Society of Chemistry journal article supplement (doi:10.1039/b503794h), 2005-01-01
Supplement: b503794h.pdf [file b503794h.pdf]

## Supplementary Information

### Platinum(II) 1,10-phenanthroline complexes of acetylides containing redox-active groups

Ulrich Siemeling,<sup>\*a</sup> Kirstin Bausch,<sup>a</sup> Heinrich Fink,<sup>a</sup> Clemens Bruhn,<sup>a</sup> Marc Baldus,<sup>b</sup>  
Brigitta Angerstein,<sup>b</sup> Regina Plessow<sup>c</sup> and Andreas Brockhinke<sup>\*c</sup>

<sup>a</sup> Institute of Chemistry and Centre for Interdisciplinary Nanostructure Science and  
Technology (CINsaT), University of Kassel, D-34109 Kassel, Germany

E-mail: siemeling@uni-kassel.de

<sup>b</sup> Department of NMR-based Structural Biology, Max Planck Institute for Biophysical  
Chemistry, D-37077 Göttingen, Germany

<sup>c</sup> Faculty of Chemistry, University of Bielefeld, D-33501 Bielefeld, Germany

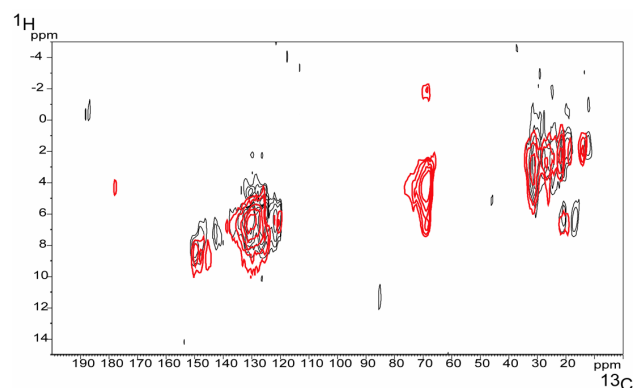

**Fig. S1** Solid-state  $^1\text{H}$ - $^{13}\text{C}$  HETCOR NMR spectrum of  $[\text{Pt}(\mathbf{1})(\text{C}\equiv\text{C}-\text{Ph})_2]$  (black) and  $[\text{Pt}(\mathbf{1})(\text{C}\equiv\text{C}-p\text{-C}_6\text{H}_4\text{-C}\equiv\text{C}-\text{Fc})_2]$  (red).

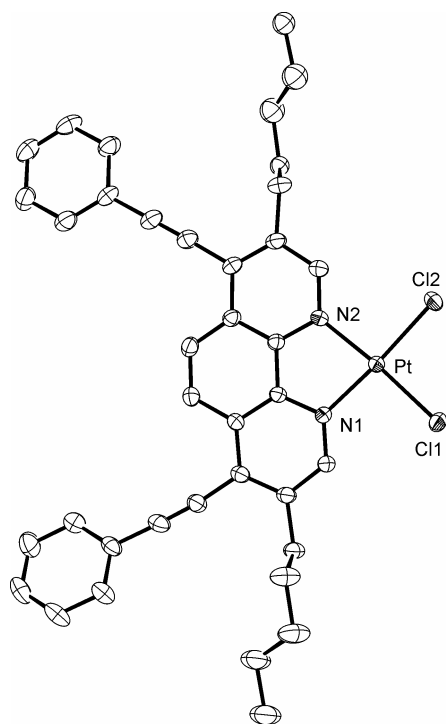

**Fig. S2** ORTEP diagram of the molecular structure of  $[\text{Pt}(\mathbf{1})\text{Cl}_2] \cdot 2 \text{CHCl}_3$  in the crystal. Displacement ellipsoids are drawn at the 30% probability level. H atoms and solvent molecules are omitted for clarity. Only one split layer of the disordered pentyl group is shown.

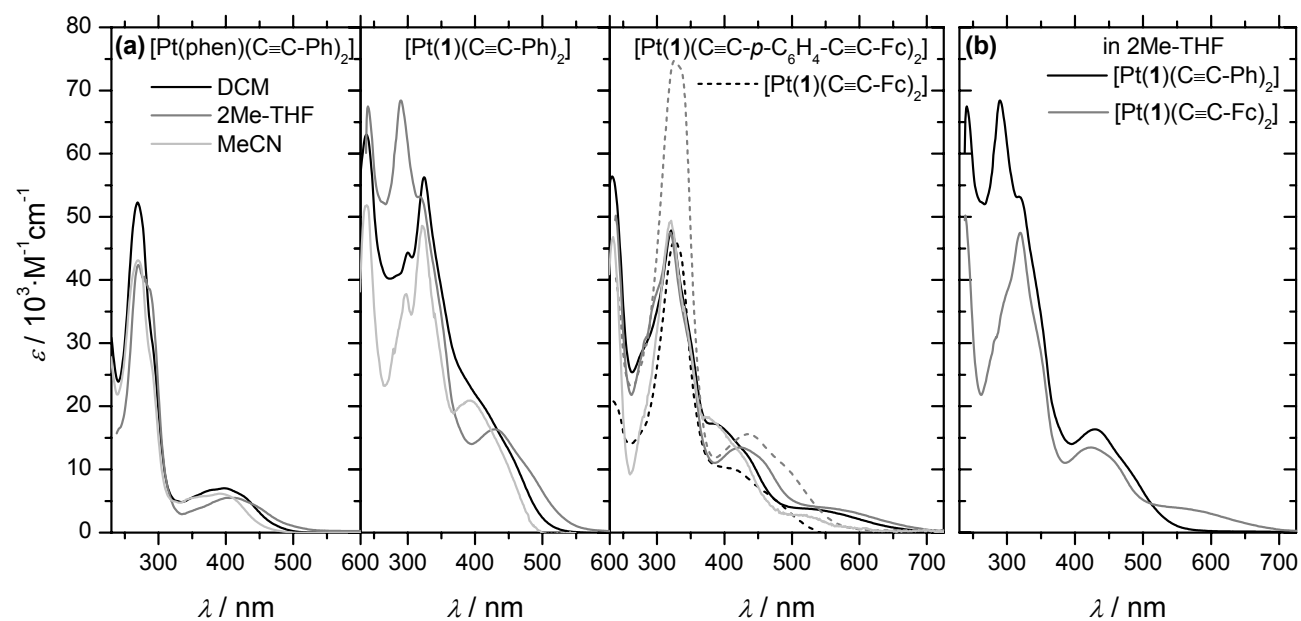

**Fig. S3** Absorption spectra at room temperature of: (a)  $[\text{Pt}(\text{phen})(\text{C}\equiv\text{C}-\text{Ph})_2]$ ,  $[\text{Pt}(\mathbf{1})(\text{C}\equiv\text{C}-\text{Ph})_2]$ ,  $[\text{Pt}(\mathbf{1})(\text{C}\equiv\text{C}-\text{Ph}-\text{C}\equiv\text{C}-\text{Fc})_2]$  and  $[\text{Pt}(\mathbf{1})(\text{C}\equiv\text{C}-\text{Fc})_2]$  in DCM, 2Me-THF and MeCN; (b)  $[\text{Pt}(\mathbf{1})(\text{C}\equiv\text{C}-\text{Ph})_2]$  and its redox-functionalised analogue  $[\text{Pt}(\mathbf{1})(\text{C}\equiv\text{C}-\text{Fc})_2]$  in 2Me-THF.

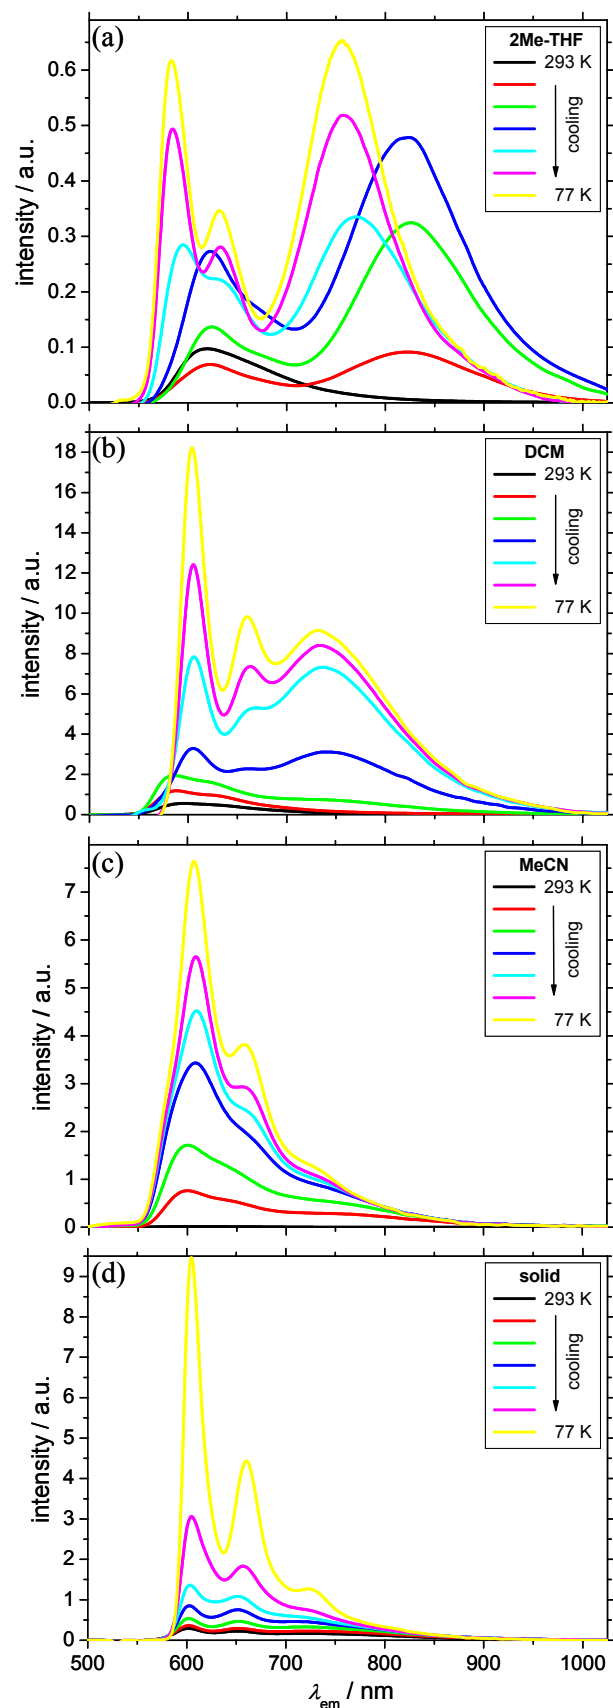

**Fig. S4** Emission spectra upon shock-freezing of [Pt(1)(C≡C-Ph)<sub>2</sub>] in different solvents and in microcrystalline form.

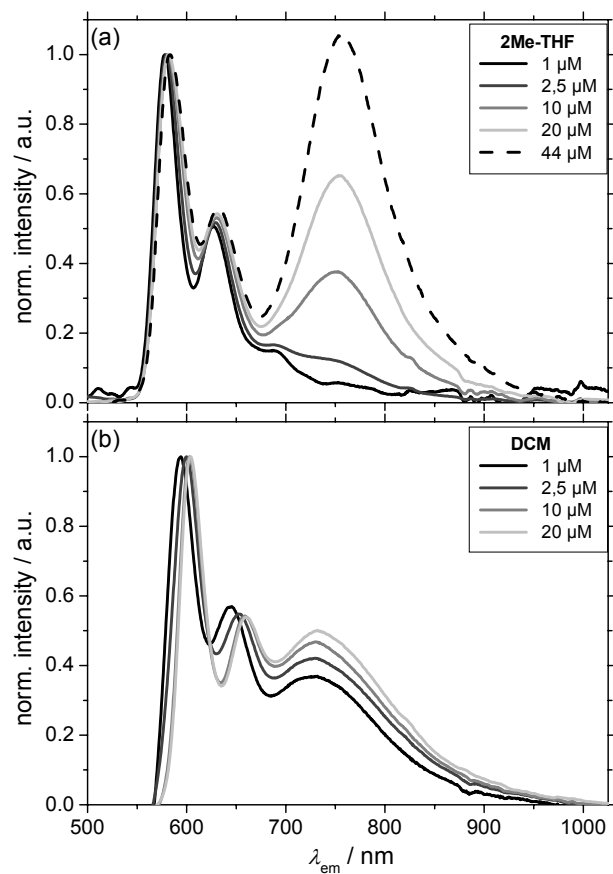

**Fig. S5** Concentration dependence of normalised luminescence spectra of [Pt(1)(C≡C-Ph)<sub>2</sub>] at 77 K in frozen glassy solution: (a) 2Me-THF; (b) DCM.
